# Supplementary material for: Impact of the Chromatin Remodeling Factor CHD1 on Gut Microbiome Composition of Drosophila melanogaster
Source: PubMed Central journal article supplement (PMC4836739; doi:10.1371/journal.pone.0153476), 2016-04-19
Supplement: pone.0153476.s001.pdf [file pone.0153476.s001.pdf]

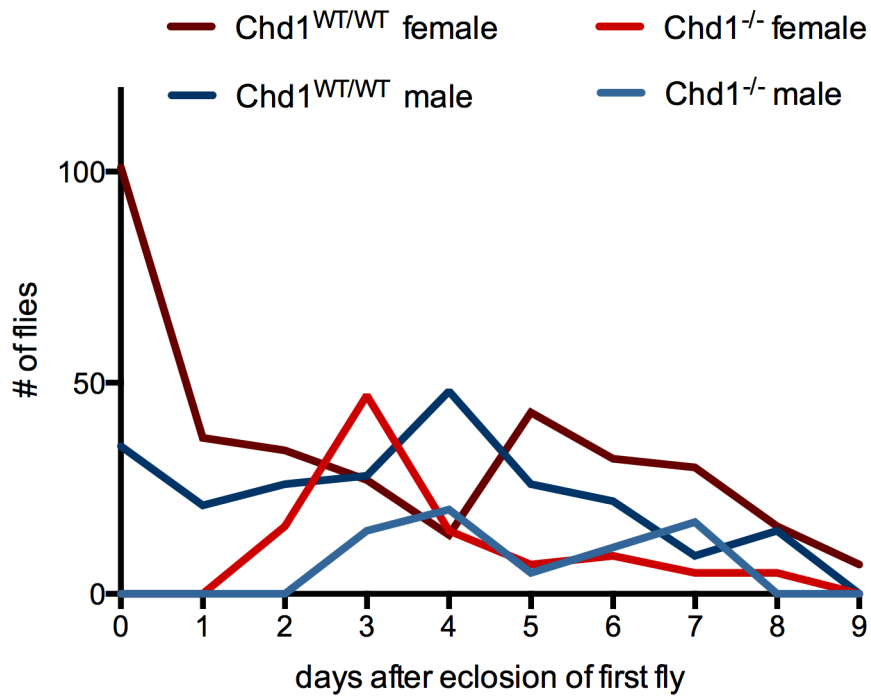

**S1 Fig. Delayed eclosion times in *Chd1*<sup>-/-</sup> versus *Chd1*<sup>WT/WT</sup> flies.** The following crosses were set up at the same time: *Df(2L)Chd1*<sup>1</sup>/*CyO* x *Df(2L)Exel*<sup>7014</sup>/*CyO* and *Df(2L)Chd1*<sup>1</sup>,*P{Chd1*<sup>WT</sup>*}*/*CyO* x *Df(2L)Exel*<sup>7014</sup>,*P{Chd1*<sup>WT</sup>*}*. Male and female offspring of the genotypes *Df(2L)Chd1*<sup>1</sup>/*Df(2L)Exel*<sup>7014</sup> (***Chd1*<sup>-/-</sup>**) and *Df(2L)Chd1*<sup>1</sup>,*P{Chd1*<sup>WT</sup>*}*/*Df(2L)Exel*<sup>7014</sup>,*P{Chd1*<sup>WT</sup>*}* (***Chd1*<sup>WT/WT</sup>**), respectively, were counted at the day of their eclosion and numbers were plotted over time.
