# Supplementary material for: Impact of the Chromatin Remodeling Factor CHD1 on Gut Microbiome Composition of Drosophila melanogaster
Source: PubMed Central journal article supplement (PMC4836739; doi:10.1371/journal.pone.0153476), 2016-04-19
Supplement: pone.0153476.s002.pdf [file pone.0153476.s002.pdf]

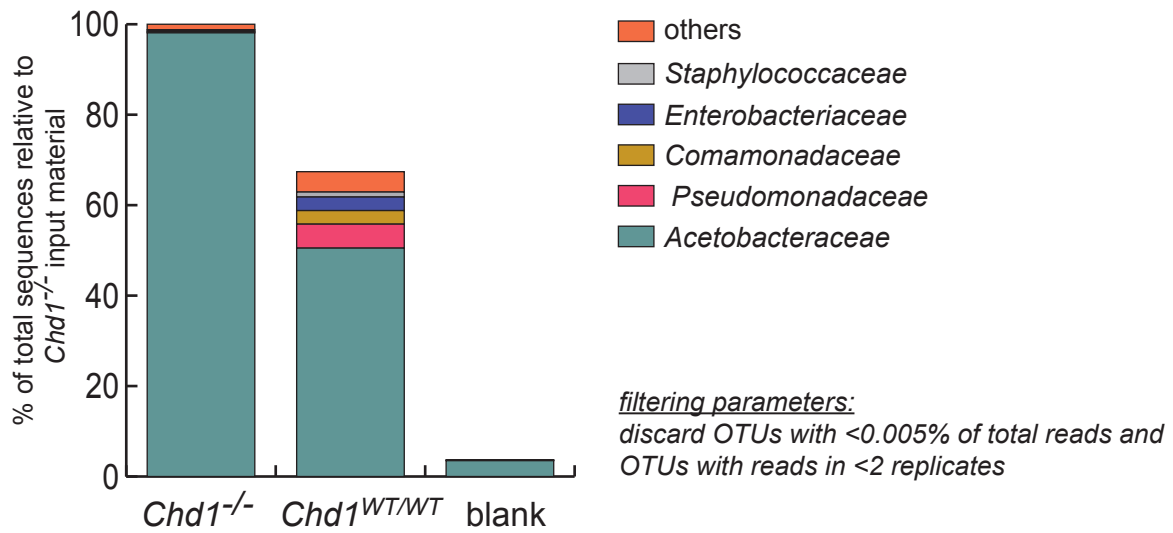

**S1 Fig. Comparison of taxa distribution in *Chd1* wild-type and mutant guts relative to total bacterial load.**
