# Supplementary material for: Impact of the Chromatin Remodeling Factor CHD1 on Gut Microbiome Composition of Drosophila melanogaster
Source: PubMed Central journal article supplement (PMC4836739; doi:10.1371/journal.pone.0153476), 2016-04-19
Supplement: pone.0153476.s003.pdf [file pone.0153476.s003.pdf]

**A**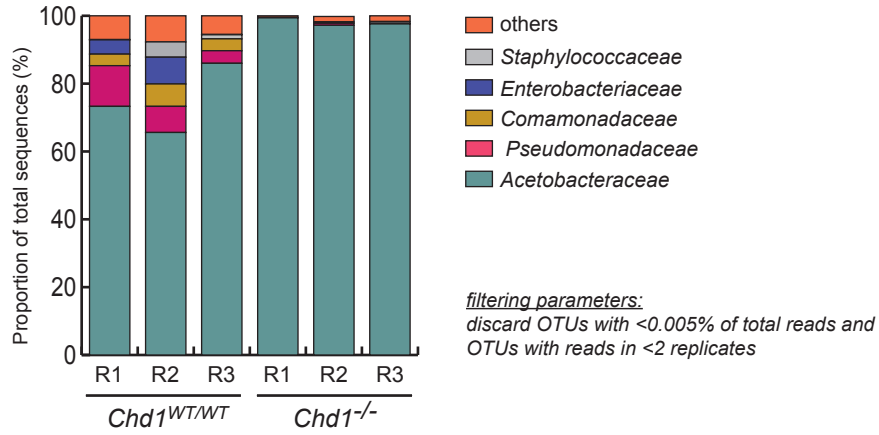**B**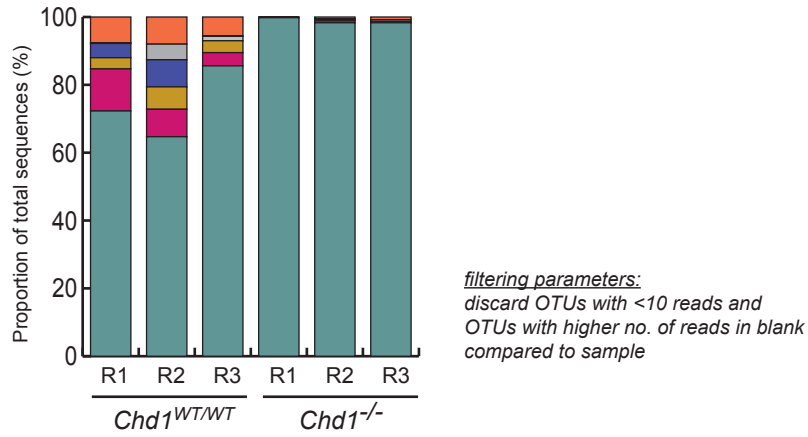**C**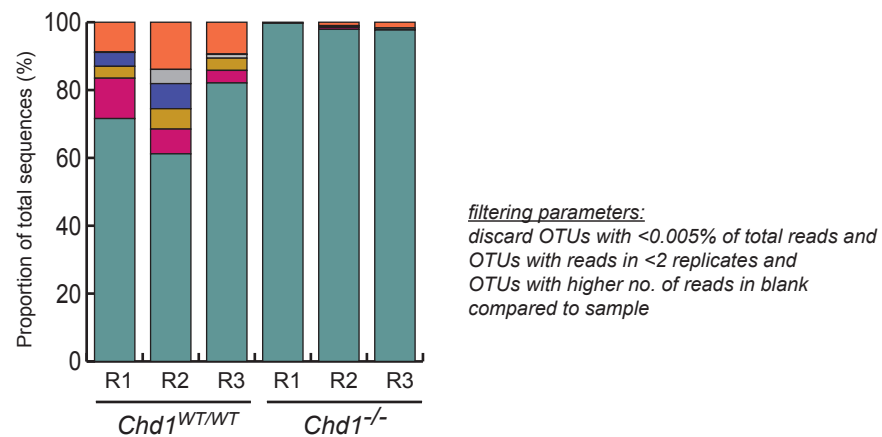

**S2 Fig. Proportion of bacterial families in the individual replicates of *Chd1*<sup>WT/WT</sup> and *Chd1*<sup>-/-</sup> guts.** Different filtering parameters were applied and are indicated next to the respective plots in (A)-(C).
