# Supplementary material for: Impact of the Chromatin Remodeling Factor CHD1 on Gut Microbiome Composition of Drosophila melanogaster
Source: PubMed Central journal article supplement (PMC4836739; doi:10.1371/journal.pone.0153476), 2016-04-19
Supplement: pone.0153476.s004.pdf [file pone.0153476.s004.pdf]

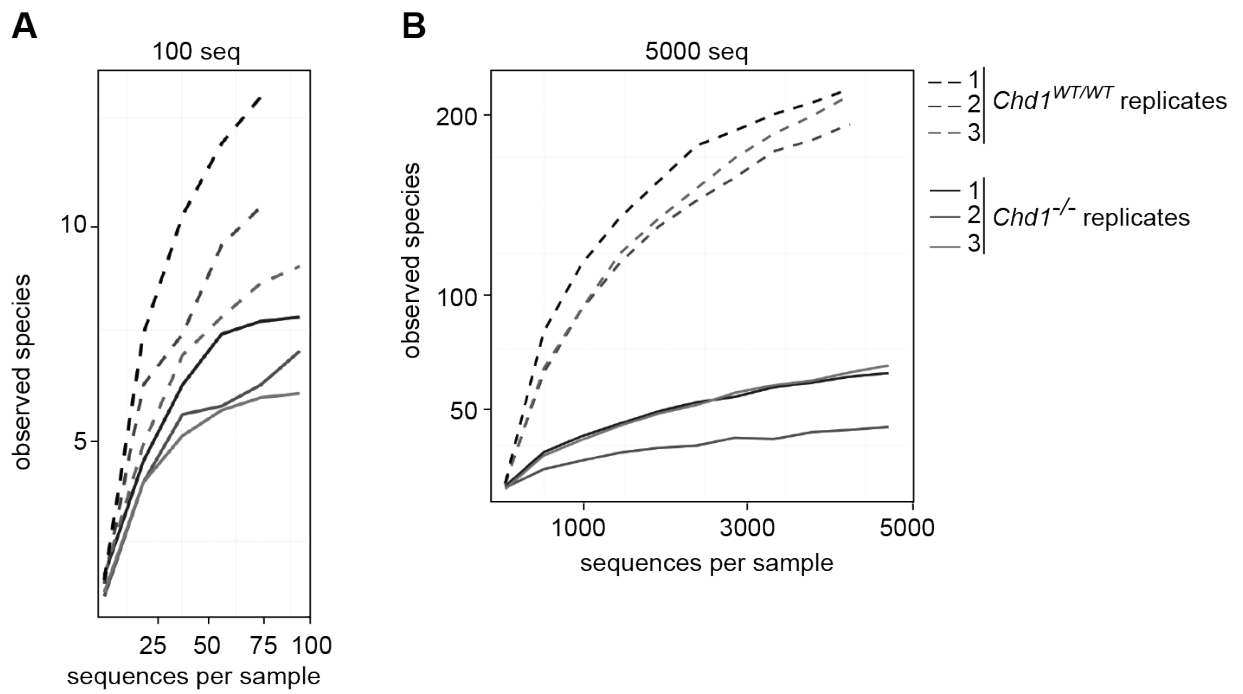

**S3 Fig. Rarefaction curves for capped sequence data sets. (A)** Capping the sequence number to 100 per sample indicates insufficient discriminatory power. **(B)** Capping sequence number to 5000 per sample suggests representative sampling and improves discrimination of *Chd1*<sup>-/-</sup> and *Chd1*<sup>WT/WT</sup> associated microbiota.
