# Supplementary material for: Impact of the Chromatin Remodeling Factor CHD1 on Gut Microbiome Composition of Drosophila melanogaster
Source: PubMed Central journal article supplement (PMC4836739; doi:10.1371/journal.pone.0153476), 2016-04-19
Supplement: pone.0153476.s007.pdf [file pone.0153476.s007.pdf]

**S3 Table. Chao1 and Shannon indices of capped datasets from *Chd1* mutant and wild-type samples.** Datasets were artificially capped to 100 and 5000 reads, respectively.

|                              |                | <i>Chao1</i><br><i>100seq</i> | <i>Shannon</i><br><i>100seq</i> | <i>Chao1</i><br><i>5000seq</i> | <i>Shannon</i><br><i>5000seq</i> |
|------------------------------|----------------|-------------------------------|---------------------------------|--------------------------------|----------------------------------|
| <i>Chd1</i> <sup>WT/WT</sup> | rep1           | 12.5                          | 1.9                             | 244.12                         | 3.46                             |
|                              | rep2           | 9.5                           | 1.81                            | 272.38                         | 3.07                             |
|                              | rep3           | 14.5                          | 2.72                            | 232.72                         | 4.56                             |
|                              | <i>mean</i>    | <b>12.17</b>                  | <b>2.14</b>                     | <b>249.74</b>                  | <b>3.70</b>                      |
| <i>Chd1</i> <sup>-/-</sup>   | rep1           | 8.0                           | 1.58                            | 84.08                          | 2.1                              |
|                              | rep2           | 7.5                           | 1.05                            | 44.75                          | 1.35                             |
|                              | rep3           | 6.0                           | 1.14                            | 100.07                         | 1.5                              |
|                              | <i>mean</i>    | <b>7.17</b>                   | <b>1.26</b>                     | <b>76.3</b>                    | <b>1.65</b>                      |
|                              | <i>P-value</i> | <b>0.0589</b>                 | <b>0.0719</b>                   | <b>0.0016**</b>                | <b>0.0268*</b>                   |

\*P-value < 0.05 is considered significant
